# Supplementary material for: Beneficial Effects of Gracillin From Rhizoma Paridis Against Gastric Carcinoma via the Potential TIPE2-Mediated Induction of Endogenous Apoptosis and Inhibition of Migration in BGC823 Cells
Source: PubMed Central journal article supplement (PMC8497801; doi:10.3389/fphar.2021.669199), 2021-09-24
Supplement: Presentation1.pdf [file Presentation1.pdf]

## Supplemental Information

### **Beneficial effects of Gracillin from *Rhizoma Paridis* against gastric carcinoma via TIPE2-mediated induction of endogenous apoptosis and inhibition of migration in BGC832 cells**

Wenming Liu<sup>1, #</sup>, Yanting Wang<sup>1, #</sup>, Junjie Chen<sup>1</sup>, Zhenhe Lin<sup>1</sup>, Mengjie Lin<sup>2</sup>, Xiantong Lin<sup>3, \*</sup>,  
Yanyun Fan<sup>1, \*</sup>

<sup>1</sup>Department of Gastroenterology, Zhongshan Hospital, Xiamen University, Xiamen 361004, Fujian Province, China

<sup>2</sup>Department of Pathology, Zhongshan Hospital, Xiamen University, Xiamen 361004, Fujian Province, China

<sup>3</sup>Department of Thoracic and Cardiovascular Surgery, The Third Hospital of Xiamen

\*Correspondence: Yanyun Fan, trudy1@163.com

#The authors contributed equally.

**Figure S1**

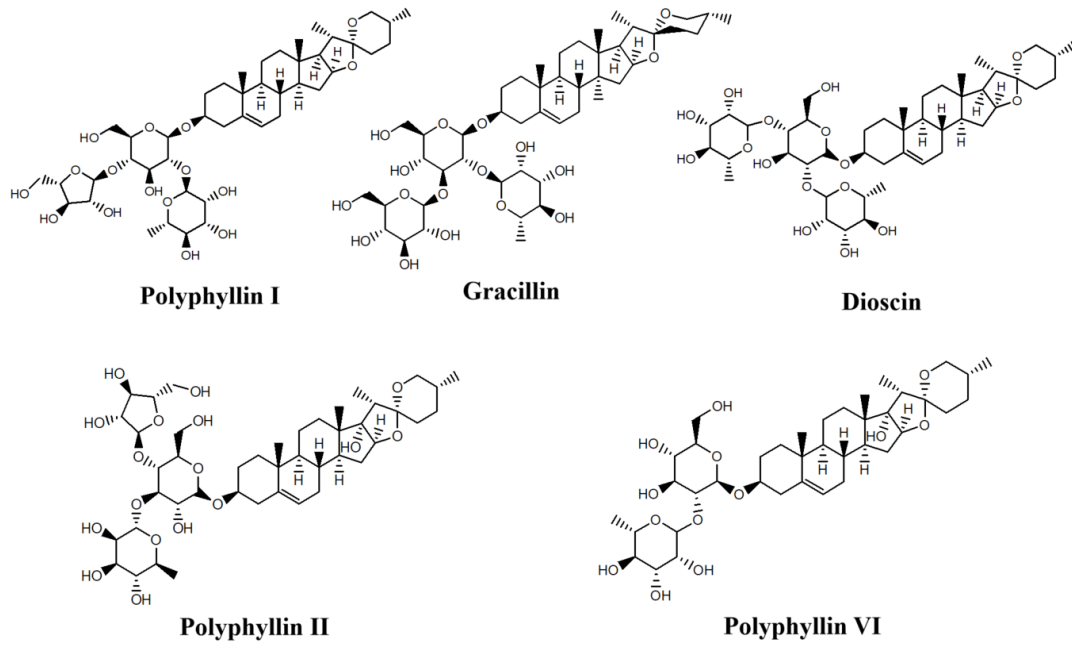

Figure S1 The structures of five active compounds

**Figure S2**

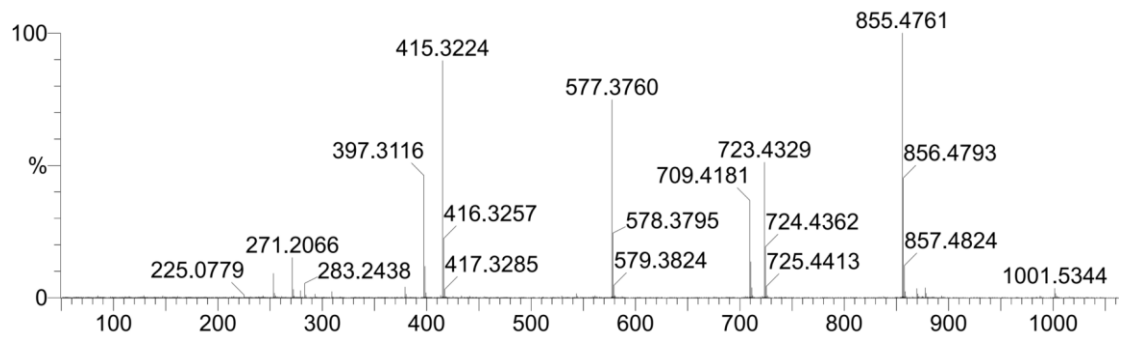

Figure S2 The MS spectra of polyphyllin I

**Figure S3**

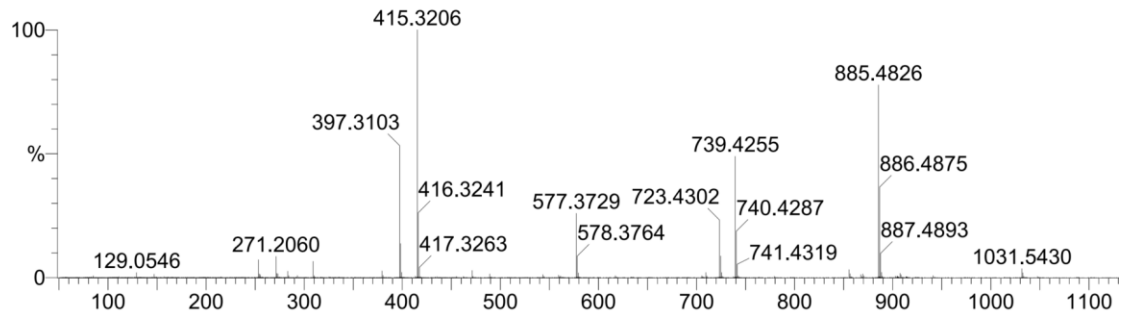

Figure S3 The MS spectra of gracillin

**Figure S4**

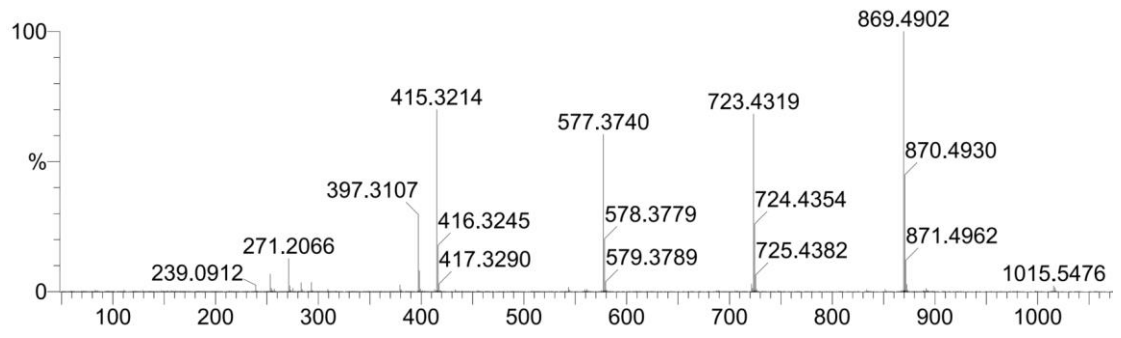

Figure S4 The MS spectra of dioscin

**Figure S5**

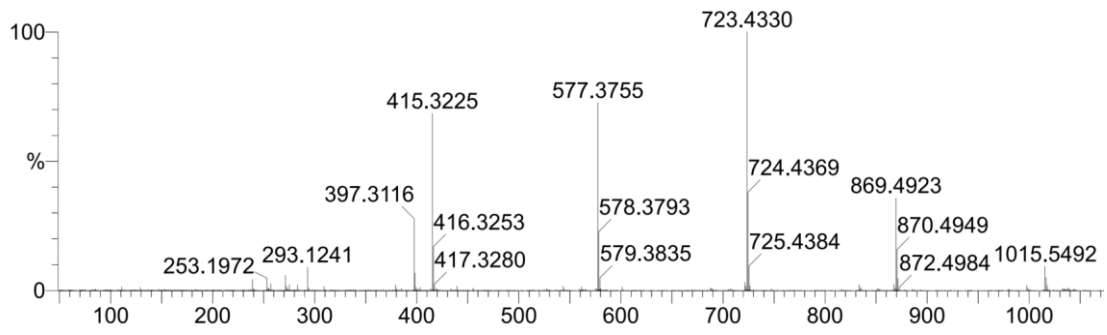

Figure S5 The MS spectra of polyphyllin II

**Figure S6**

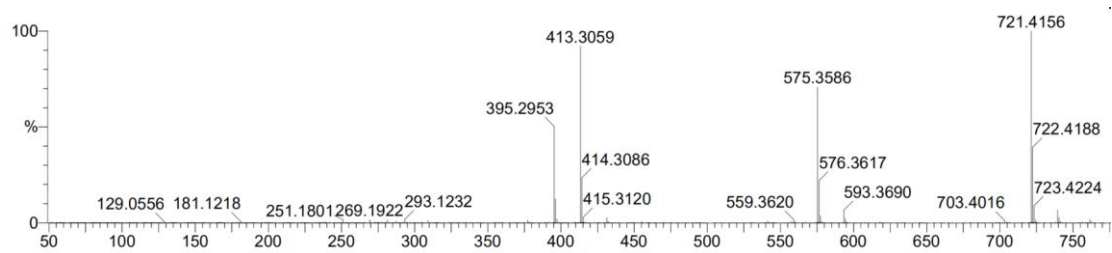

Figure S6 The MS spectra of polyphyllin VI

**Figure S7**

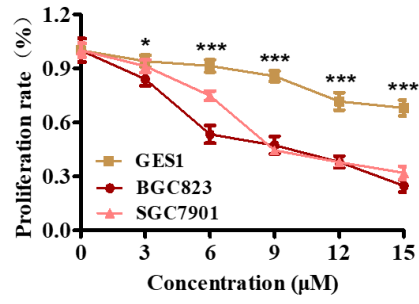

Figure S7 The effects of gracillin with the different concentrations on cell proliferation in normal gastric cell line GES1, gastric cancer cell lines BGC823 and SGC7901



## Figure S8

Gracillin

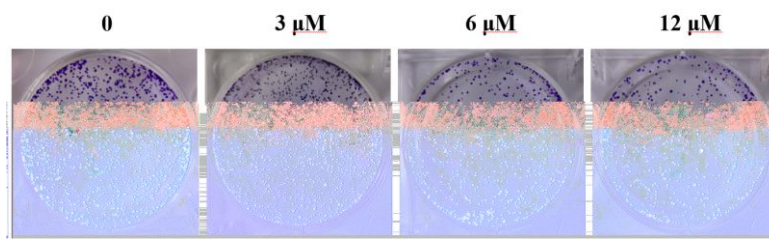

Figure S8 Colon formation for cell proliferation by gracillin in gastric cancer cell line SGC7901.

Figure S9

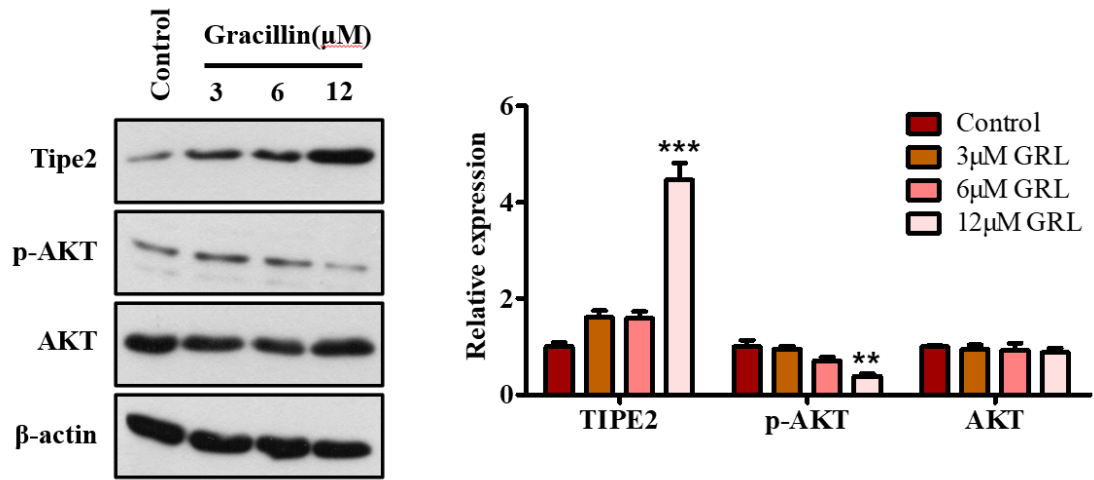

Figure S9 Western blot for detecting the protein expression of TIPE2, AKT and p-AKT mediated by gracillin in gastric cancer cell line SGC7901.

**Figure S10**

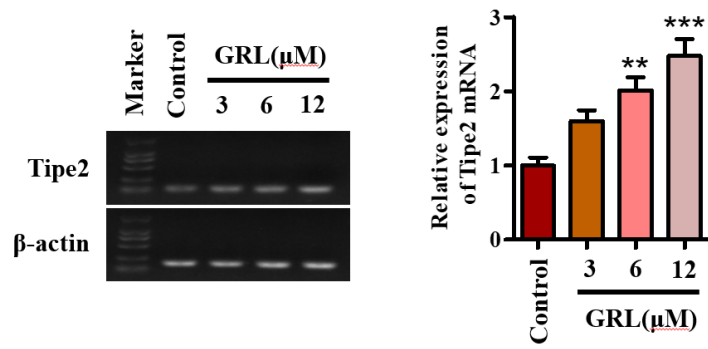

Figure S10 RT-PCR for detecting the mRNA expression of TIPE2 mediated by gracillin in gastric cancer cell line BGC823.

## Figure S11

**Normal**      **Model**      **Gracillin**

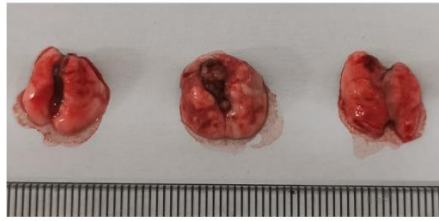

Figure S11 The representative images from lung of mice for lung metastases.

Figure S12

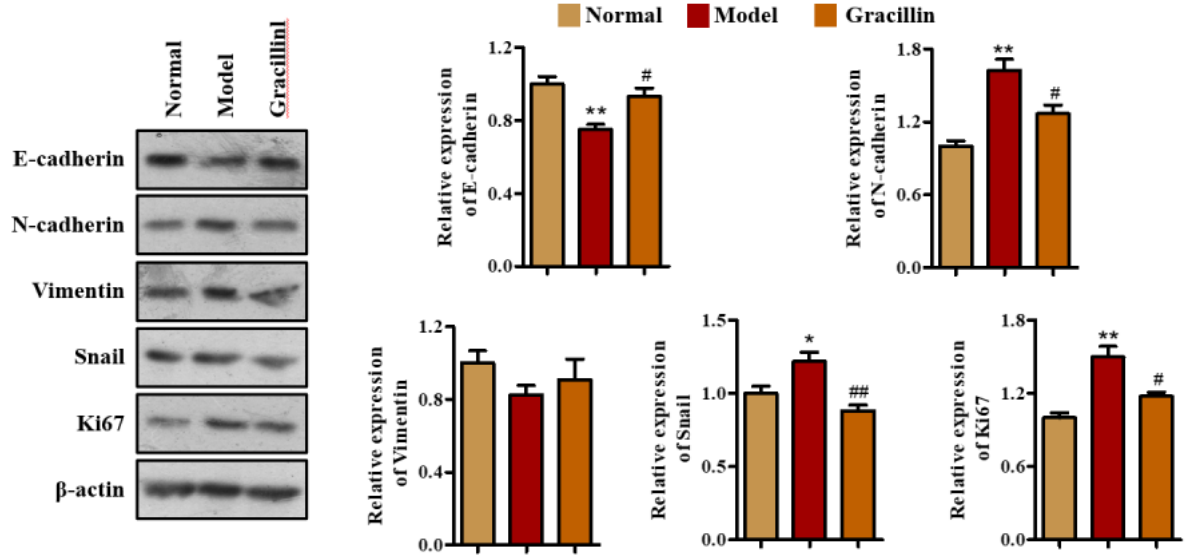

Figure S12 Western blot for detecting the tumor proliferation and metastases-associated protein expressions of ki67, E-cadherin, N-cadherin, vimentin and snail in lung tissue of mice.
